# Supplementary material for: SARS‐CoV‐2 spike spurs intestinal inflammation via VEGF production in enterocytes
Source: PubMed Central journal article supplement (PMC9081906; doi:10.15252/emmm.202114844), 2022-04-19
Supplement: EMMM-14-e14844-s001.pdf [file EMMM-14-e14844-s001.pdf]

## Expanded View Figures

### Figure EV1. VEGF level correlates with disease progression of COVID-19.

- A Immunofluorescence analysis of ACE2 and SARS-CoV-2 spike protein in the intestinal tissues of COVID-19 patients. ACE2 staining in green, spike protein staining in red and nuclear staining in blue. Scale bars, 50  $\mu$ m.
- B The percentage of spike stained positive in different parts of the intestinal tissues from patients with COVID-19. Number of samples for each group as indicated.
- C ELISA analysis of VEGF concentration in plasma of COVID-19 patients with ( $n = 11$ ) or without ( $n = 8$ ) GI symptoms.
- D ELISA analysis of VEGF concentration in plasma of COVID-19 patients with ( $n = 8$ ) or without ( $n = 11$ ) disease progression.
- E Temporal course of plasma VEGF at the early and late stage of COVID-19 infection by ELISA analysis. Data shown are the levels of plasma VEGF in patients with ( $n = 8$ ) and without ( $n = 11$ ) disease progression at the early stage (one to three days after laboratory-confirmed for COVID-19) and late stage (more than three days after laboratory-confirmed for COVID-19).
- F mRNA levels of VEGF-B and VEGF-C in the intestinal tissues from COVID-19 patients ( $n = 5$ ) or healthy controls ( $n = 5$ ) by RNA-seq.
- G mRNA levels of VEGFR1, VEGFR2, and VEGFR3 in the intestinal tissues from COVID-19 patients ( $n = 5$ ) or healthy controls ( $n = 5$ ) by RNA-seq.

Data information: All data are shown as mean  $\pm$  SD. *P* values are determined by Student's *t*-test.

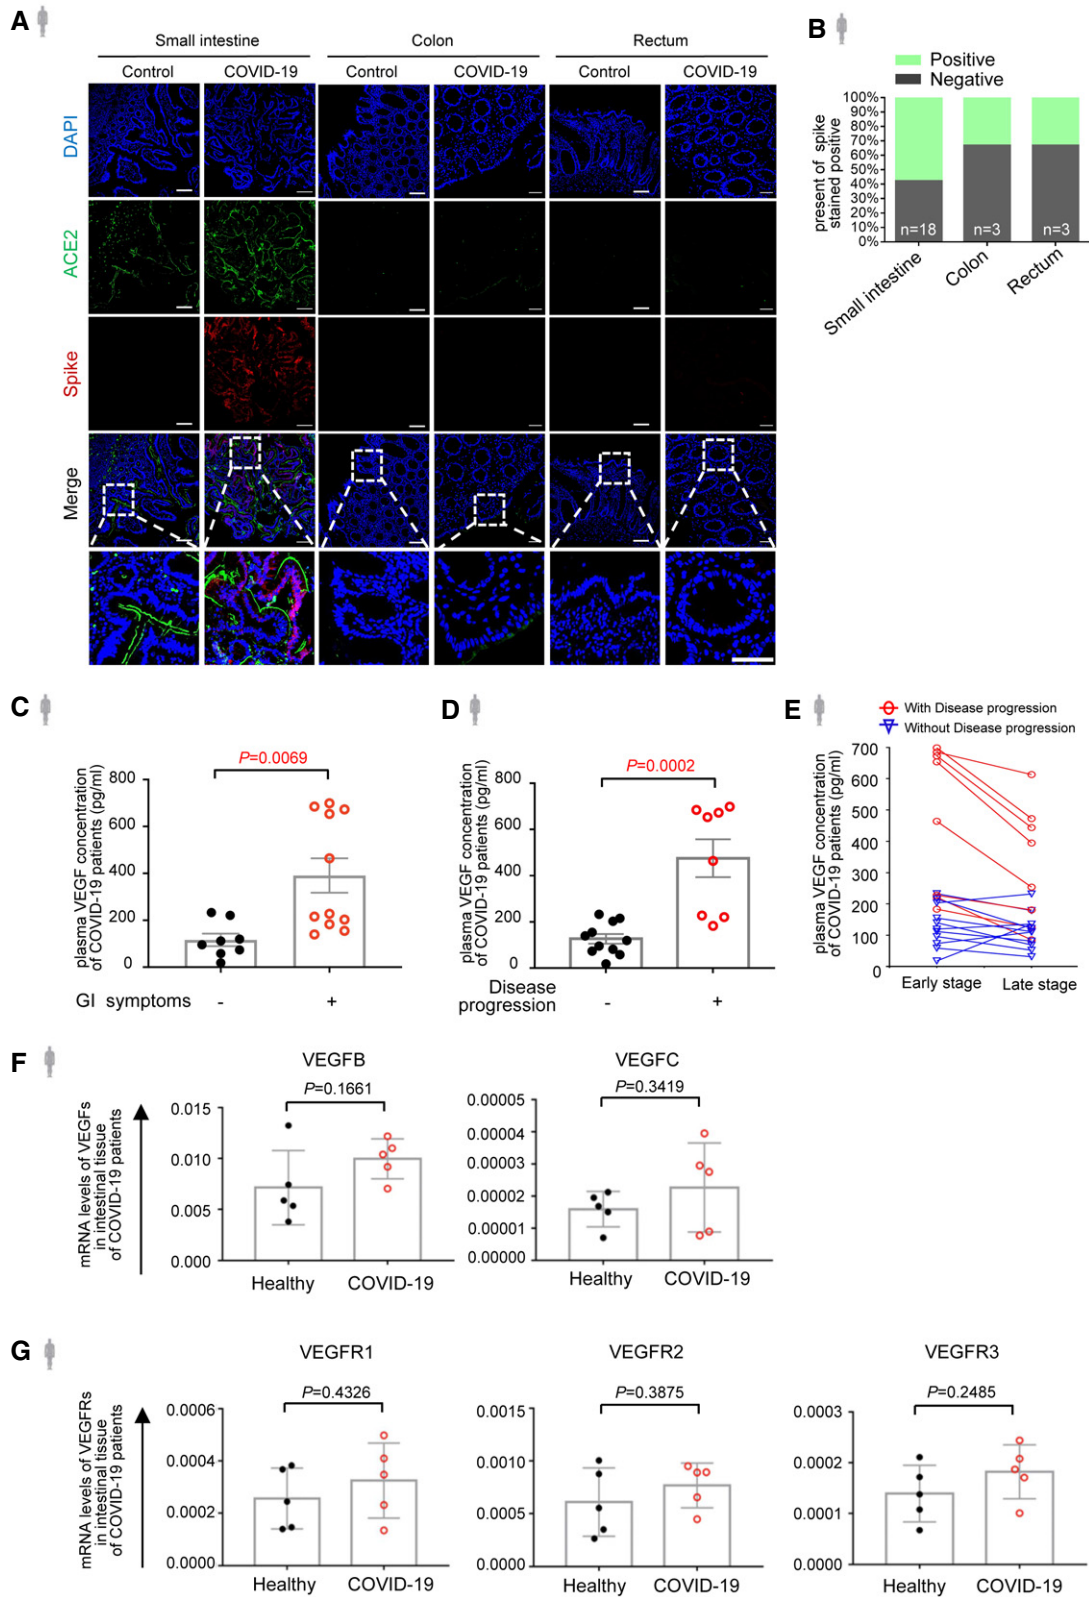

Figure EV1.

**Figure EV2. Generation of an animal model that mimics the intestinal inflammation in COVID-19.**

- A Recombinant SARS-CoV-2 spike consists of receptor binding domain (RBD, Arg319-Phe541) and Fc region at the C-terminus. Human IgG-Fc was adopted as control protein.
- B Immunofluorescence analysis of ACE2 and spike RBD in murine intestinal tissue. ACE2 staining in green, spike RBD staining in red and nuclear staining in blue. Scale bar, 50  $\mu\text{m}$ .
- C, D The scatter chart shows the SARS-CoV-2 spike RBD staining (C) or the ACE2 staining (D) in murine intestinal tissues. Control-Fc,  $n = 5$ ; Spike RBD-Fc,  $n = 6$ , biologically independent samples (mice).
- E Representative H&E images of inflammation in the intestinal tissues from animals treated with only Spike RBD-Fc or Control-Fc. Scale bar, 100  $\mu\text{m}$ . Control-Fc,  $n = 1$ ; Spike RBD-Fc,  $n = 1$ .  $n$ , biologically independent samples (mice).
- F qRT-PCR analysis of levels of inflammatory factors in the intestinal tissues of mice treated with Control-Fc or Spike RBD-Fc. Control-Fc,  $n = 5$ ; Spike RBD-F,  $n = 6$ ,  $n$ , biologically independent samples (mice).

Data information: All data are shown as mean  $\pm$  SD. For (C) and (D),  $P$  values are determined by one-way ANOVA; for (F),  $P$  values are determined by Student's  $t$ -test.

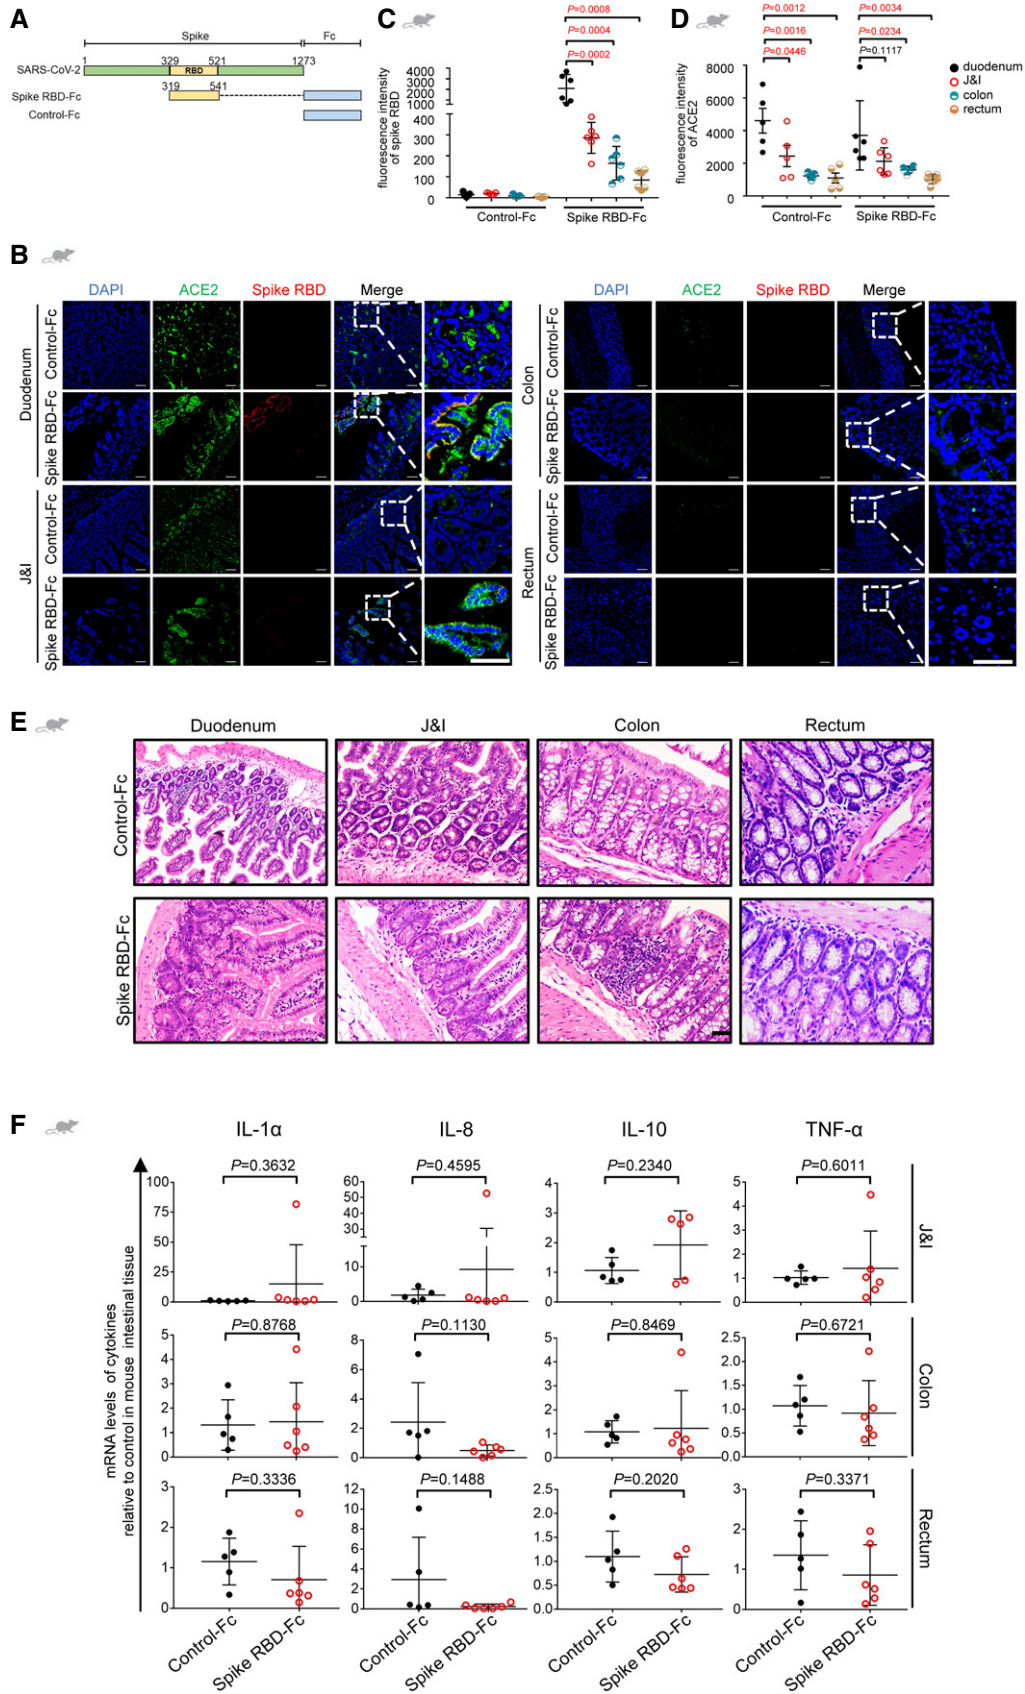

Figure EV2.

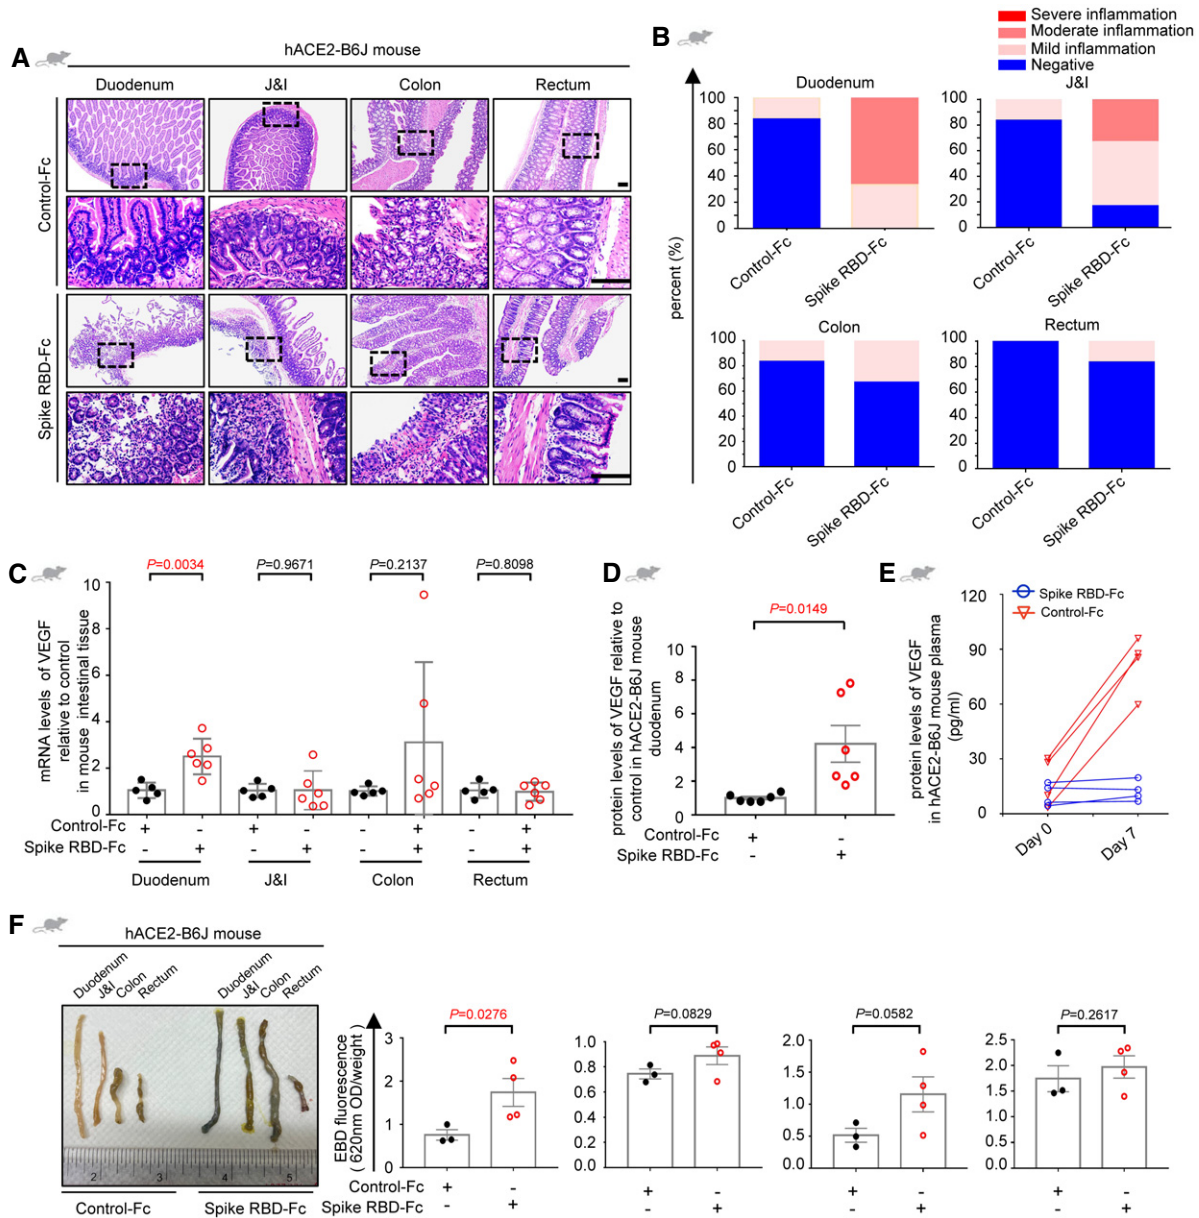

**Figure EV3. SARS-CoV-2 spike protein induces intestinal permeability via VEGF overproduction.**

- A, B Representative H&E images (A) and the quantitative analysis of inflammation (B) of the intestinal tissues from hACE2-B6J mouse treated with Spike RBD-Fc or Control-Fc. Scale bar, 100  $\mu$ m. For each group,  $n = 6$ ,  $n$ , biologically independent samples (mice).
- C qRT-PCR analysis of levels of VEGF in the intestinal tissues of mice treated with Control-Fc or Spike RBD-Fc. Control-Fc,  $n = 5$ ; Spike RBD-Fc,  $n = 6$ ,  $n$ , biologically independent samples (mice).
- D ELISA analysis of VEGF concentration in duodenum tissue of hACE2-B6J mice treated with Control-Fc or Spike RBD-Fc. For each group,  $n = 6$ ,  $n$ , biologically independent samples (mice).
- E ELISA analysis of VEGF concentration in plasma of hACE2-B6J mice after six hours treatment with Control-Fc or Spike RBD-Fc, or seven days after treated with Control-Fc or Spike RBD-Fc daily. For each group,  $n = 4$ ,  $n$ , biologically independent samples (mice).
- F Evaluation of intestinal permeability in hACE2 B6J mice after seven days treatment with Control-Fc or Spike RBD-Fc daily by the Evans Blue dye extravasation assay. Control-Fc,  $n = 3$ ; Spike RBD-Fc,  $n = 4$ ,  $n$ , biologically independent samples (mice).

Data information: All data are shown as mean  $\pm$  SD.  $P$  values are determined by Student's  $t$ -test.

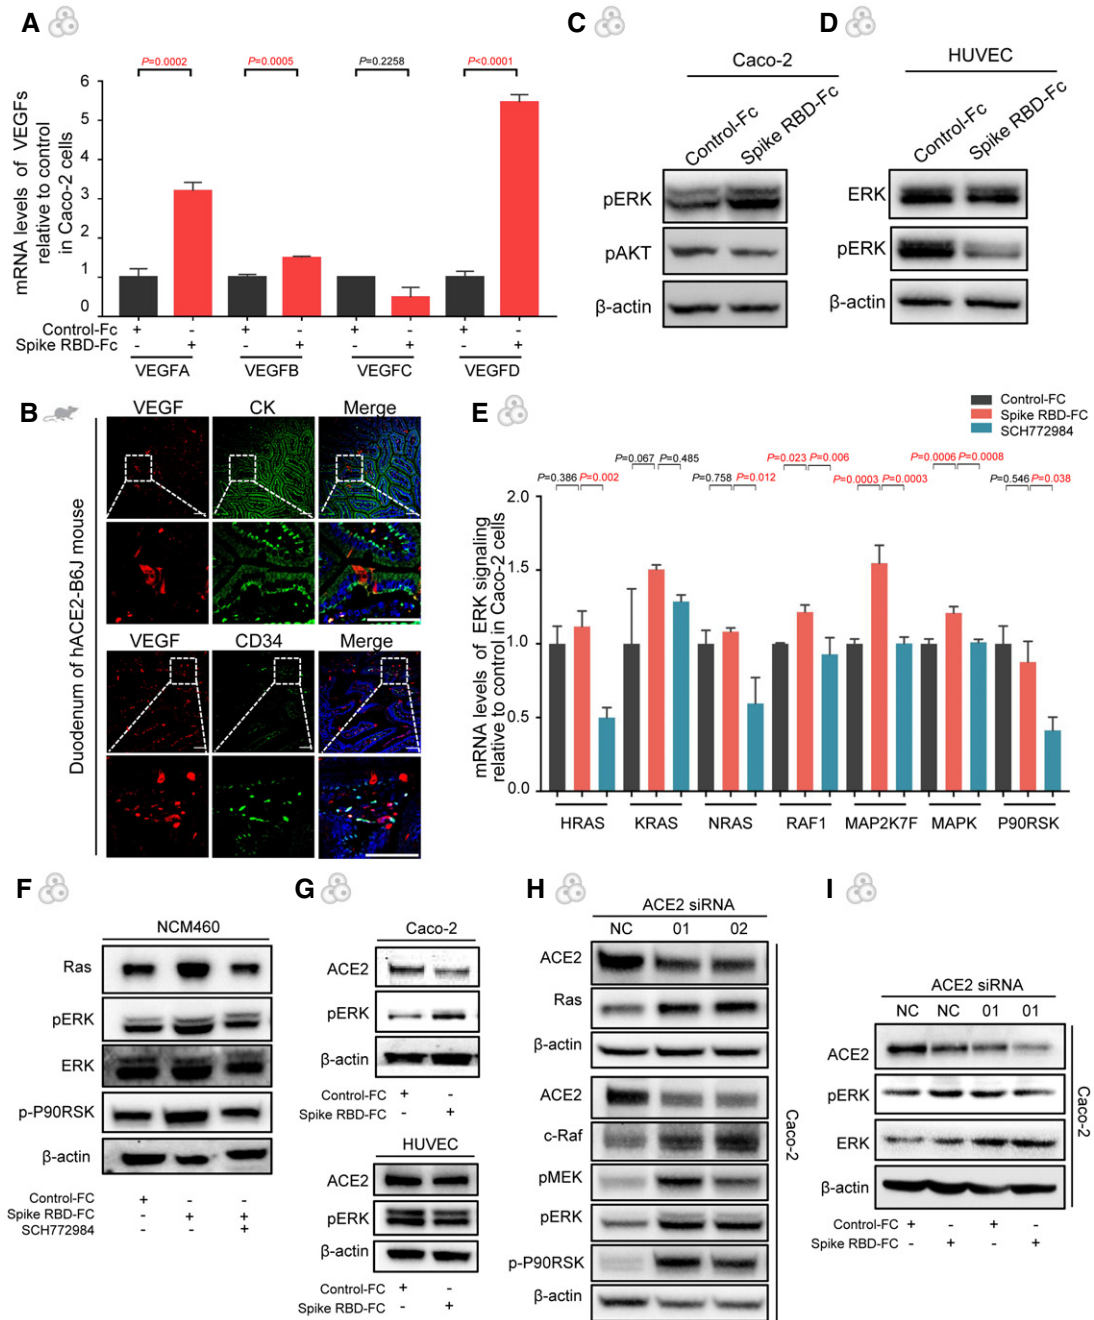

Figure EV4.

**Figure EV4. SARS-CoV-2 spike promotes VEGF production in enterocytes via the ERK pathway.**

- A qRT-PCR analysis of the transcription level of VEGF isoforms in Caco-2 cells treated with the Control-Fc or Spike RBD-Fc. Data are from three technical replicates with similar results from three biological replicates.
- B Immunofluorescence analysis of VEGF, CK, and CD34 protein in the duodenum of hACE2-B6J mouse. CK and CD34 staining in green, VEGF staining in red and nuclear staining in blue. Scale bars, 50  $\mu\text{m}$ . Representative images of two to three biological replicates.
- C The expression of the pERK and pAKT in Caco-2 cells were detected by Western blot. Caco-2 cells were treated with Control-Fc or Spike RBD-Fc.  $\beta$ -actin was used as a reference gene.
- D The expression of the ERK and pERK in HUVECs were detected by Western blot. HUVECs were treated with Control-Fc or Spike RBD-Fc.  $\beta$ -actin was used as a reference gene.
- E qRT-PCR analysis of the transcription level of ERK pathway in Caco-2 cells treated with the Control-Fc or Spike RBD-Fc. Data are from three technical replicates with similar results from three biological replicate experiments.
- F The levels of Ras, pERK, ERK, and p-P90RSK in NCM460 cells treated with Control-Fc, Spike RBD-Fc or Spike RBD-Fc combined with SCH772984 by Western blot.  $\beta$ -actin was used as a reference gene.
- G The levels of ACE2 and pERK in Caco-2 and HUVEC cells treated with Control-Fc or Spike RBD-Fc by Western blot.  $\beta$ -actin was used as a reference gene.
- H The levels of Ras, c-Raf, pMEK, pERK, ERK, and p-P90RSK in Caco-2 with ACE2 knockdown by Western blot.  $\beta$ -actin was used as a reference gene.
- I The levels of ACE2, pERK, and ERK in Caco-2 cells treated with Control-Fc, Spike RBD-Fc with ACE2 knockdown by Western blot.  $\beta$ -actin was used as a reference gene.

Data information: All data are shown as mean  $\pm$  SD. For (A), *P* values are determined by Student's *t*-test; for (E), *P* values are determined by one-way ANOVA.

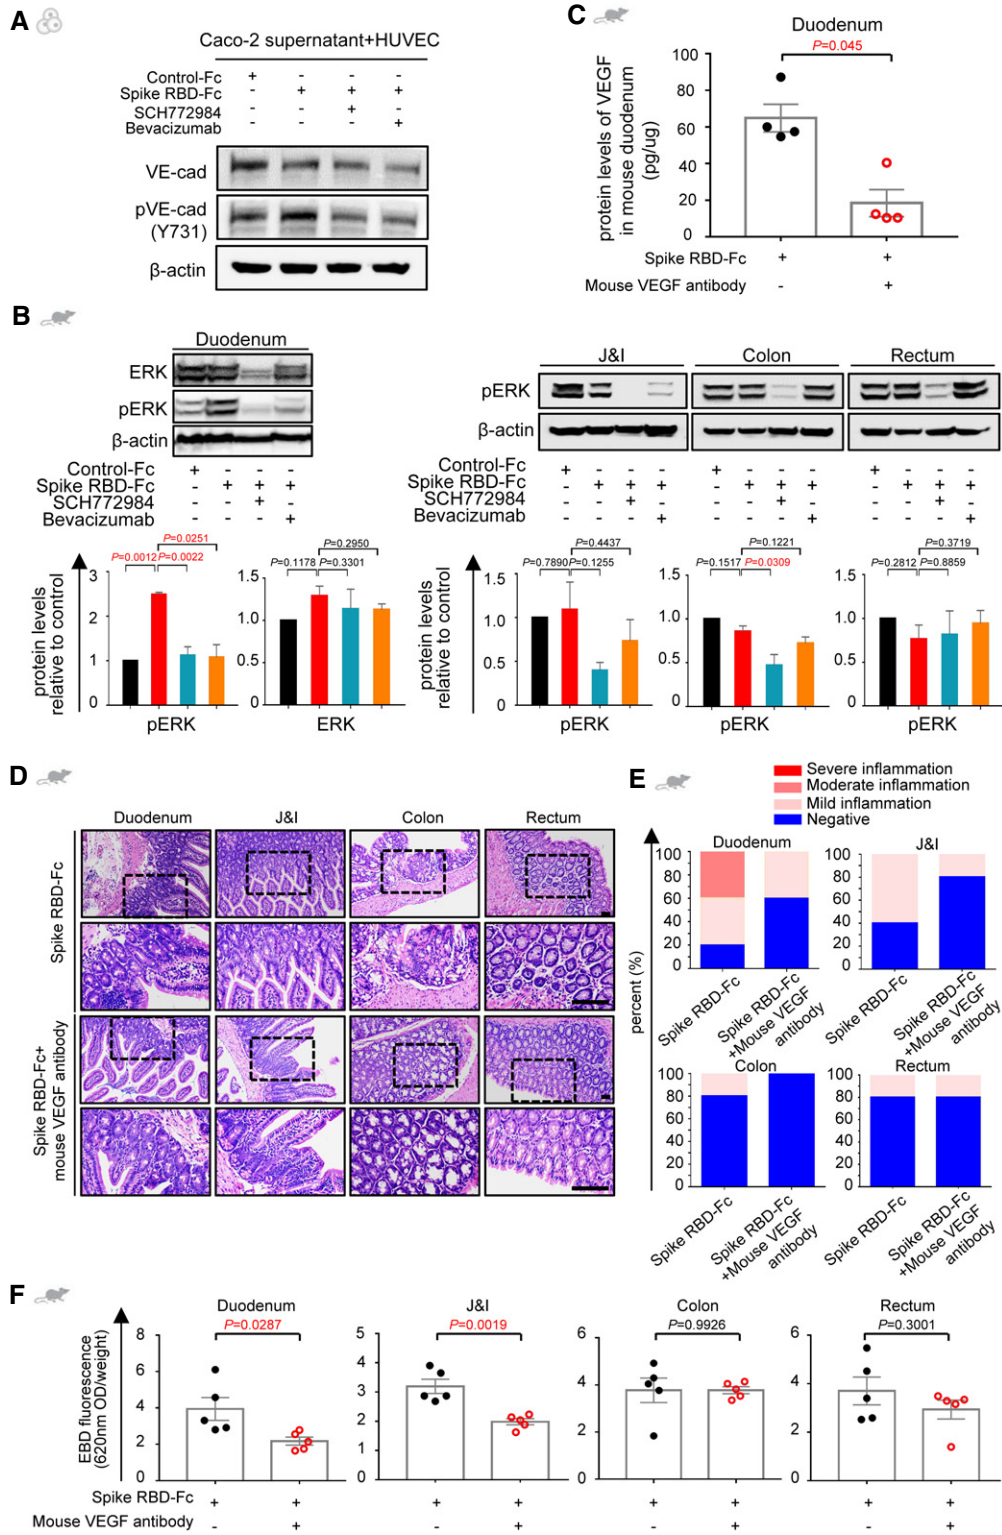

Figure EV5.



◀ **Figure EV5. Murine VEGF antibody inhibit spike-induced hyperpermeability and intestinal inflammation.**

- A The expression of VE-cadherin (VE-cad) and pVE-cad (731) in HUVECs co-cultured with the supernatant from Caco-2 cells that were treated with either Control-Fc, Spike RBD-Fc, or Spike RBD-Fc combined with SCH772984 or Bevacizumab by Western blot.  $\beta$ -actin was used as a reference gene.
- B Levels of ERK and pERK in intestinal tissues of mice treated with Control-Fc, Spike RBD-Fc, or Spike RBD-Fc combined with SCH772984 or Bevacizumab by Western blot. GAPDH or  $\beta$ -actin was used as a reference gene. Data are shown from three independent biological experiments.
- C ELISA analysis of VEGF concentration in duodenum tissues of mice treated with Spike RBD-Fc or Spike RBD-Fc combined with mouse VEGF antibody. For each group,  $n = 4$ .  $n$ , biologically independent samples (mice).
- D, E Representative H&E images (D) and the quantitative analysis of inflammation (E) of the intestinal tissues from mouse treated with Spike RBD-Fc or Spike RBD-Fc combined with mouse VEGF antibody. Scale bar, 100  $\mu$ m. For each group,  $n = 5$ .  $n$ , biologically independent samples (mice).
- F Evaluation of intestinal permeability in animals treated with Spike RBD-Fc or Spike RBD-Fc combined with mouse VEGF antibody by the Evans Blue dye extravasation assay. For each group,  $n = 5$ .  $n$ , biologically independent samples (mice).

Data information: Data are shown as mean  $\pm$  SD. For (B),  $P$  values are determined by one-way ANOVA; for (C) and (F),  $P$  values are determined by Student's  $t$ -test; ns, not significant.
