# Supplementary material for: SARS‐CoV‐2 spike spurs intestinal inflammation via VEGF production in enterocytes
Source: PubMed Central journal article supplement (PMC9081906; doi:10.15252/emmm.202114844), 2022-04-19
Supplement: EMMM-14-e14844-s004.pdf [file EMMM-14-e14844-s004.pdf]

**Table EV1. The clinicopathological characteristics of COVID-19 patients with GI symptoms**

|                                                                        | Test cohort<br>(n=18) | Validation cohort<br>(n=19) |
|------------------------------------------------------------------------|-----------------------|-----------------------------|
| Mean age                                                               | 44.8                  | 51.2                        |
| Sex                                                                    |                       |                             |
| Male                                                                   | 12 (66.7%)            | 11 (57.9%)                  |
| Female                                                                 | 6 (33.3%)             | 8 (42.1%)                   |
| Symptoms                                                               |                       |                             |
| Disease classification                                                 |                       |                             |
| Non-severe                                                             | 14 (77.8%)            | 9 (47.4%)                   |
| Severe                                                                 | 4 (22.2%)             | 10 (52.6%)                  |
| Diarrhoea                                                              | 3 (16.7%)             | 6 (31.6%)                   |
| Anorexia                                                               | 0 (0%)                | 7 (36.8%)                   |
| Nausea                                                                 | 3 (16.7%)             | 4 (21.1%)                   |
| Vomit                                                                  | 1 (5.6%)              | 3 (15.8%)                   |
| Acid reflux                                                            | 3 (16.7%)             | 0 (0%)                      |
| Epigastric discomfort                                                  | 4 (22.2%)             | 7 (36.8%)                   |
| Hepatic function impairment                                            |                       |                             |
| Total bilirubin ( $\mu\text{mol/L}$ ; normal range 3.0–24.0) Increased | 6 (33.3%)             | 6 (31.6%)                   |
| ALT (U/L; normal range 7–40 in female, 9–50 in male) Increased         | 6 (33.3%)             | 8 (42.1%)                   |
| AST (U/L; normal range 13–35 in female, 15–40 in male) Increased       | 11 (61.1%)            | 6 (31.6%)                   |
| serologic markers of disease severity                                  |                       |                             |
| CRP ( $\mu\text{g/L}$ ; normal range 0.068-8.2)                        | 8 (44.4%)             | 16 (84.2%)                  |
| D-dimers ( $\mu\text{g/L}$ ; normal range 0-243)                       | 7 (38.9%)             | 12 (63.2%)                  |
| Procalcitonin (ng/L; normal range 0-0.5)                               | 3 (16.7%)             | 4 (21.1%)                   |
| Nucleic acid test results of fecal samples (Positive)                  | 16 (88.9%)            | 7 (36.8%)                   |

Data are presented as n (%) and % is the percentage in 18 patients (test cohort) or 19 patients (validation cohort)

ALT, alanine aminotransferase; AST, aspartate transaminase (value on initial presentation); CRP, C-reactive protein
